# Supplementary material for: Genomic Variants Associated with Resistance to High Fat Diet Induced Obesity in a Primate Model
Source: PubMed Central journal article supplement (PMC5095882; doi:10.1038/srep36123), 2016-11-04
Supplement: srep36123-s1.pdf [file srep36123-s1.pdf]

**Supplemental Information for:**

**Genomic Variants Associated with Resistance to High Fat Diet Induced Obesity  
in a Primate Model**

R. Alan Harris PhD<sup>1,2</sup>, Callison E. Alcott<sup>3</sup>, Elinor L. Sullivan PhD<sup>4,5</sup>, Diana Takahashi<sup>4</sup>, Carrie E. McCurdy PhD<sup>6</sup>, Sarah Comstock PhD<sup>7</sup>, Karalee Baquero<sup>4</sup>, Peter Blundell<sup>4</sup>, Antonio E. Frias, MD<sup>4,8</sup>, Maike Kahr MD<sup>1</sup>, Melissa Suter PhD<sup>1</sup>, Stephanie Wesolowski PhD<sup>9</sup>, Jacob E. Friedman PhD<sup>9</sup>, Kevin L. Grove PhD<sup>4</sup>, and Kjersti M. Aagaard MD PhD<sup>§1,2,3,4,10</sup>

**Affiliations:**

<sup>1</sup>Department of Obstetrics & Gynecology, Division of Maternal-Fetal Medicine at Baylor College of Medicine and Texas Children's Hospital, Houston, TX.

<sup>2</sup>Department of Molecular and Human Genetics at Baylor College of Medicine, Houston, TX.

<sup>3</sup> Developmental Biology Interdisciplinary Program at Baylor College of Medicine, Houston, TX.

<sup>4</sup>Oregon National Primate Research Center, Oregon Health & Science University (OHSU), Beaverton, OR.

<sup>5</sup> Department of Biology, University of Portland

<sup>6</sup>Department of Human Physiology, University of Oregon, Eugene, OR.

<sup>7</sup>Department of Biology, Corban University, Salem, OR.

<sup>8</sup>Department of Obstetrics & Gynecology, Division of Maternal-Fetal Medicine, OHSU, Portland, OR.

<sup>9</sup>Departments of Pediatrics, University of Colorado Anschutz Medical Campus, Aurora, CO.

<sup>10</sup>Department of Molecular and Cell Biology at Baylor College of Medicine, Houston, TX.

§Correspondence to:

Kjersti Aagaard, M.D. Ph.D.

Baylor College of Medicine

Department of Obstetrics & Gynecology

Houston, TX 77030

aagaardt@bcm.edu

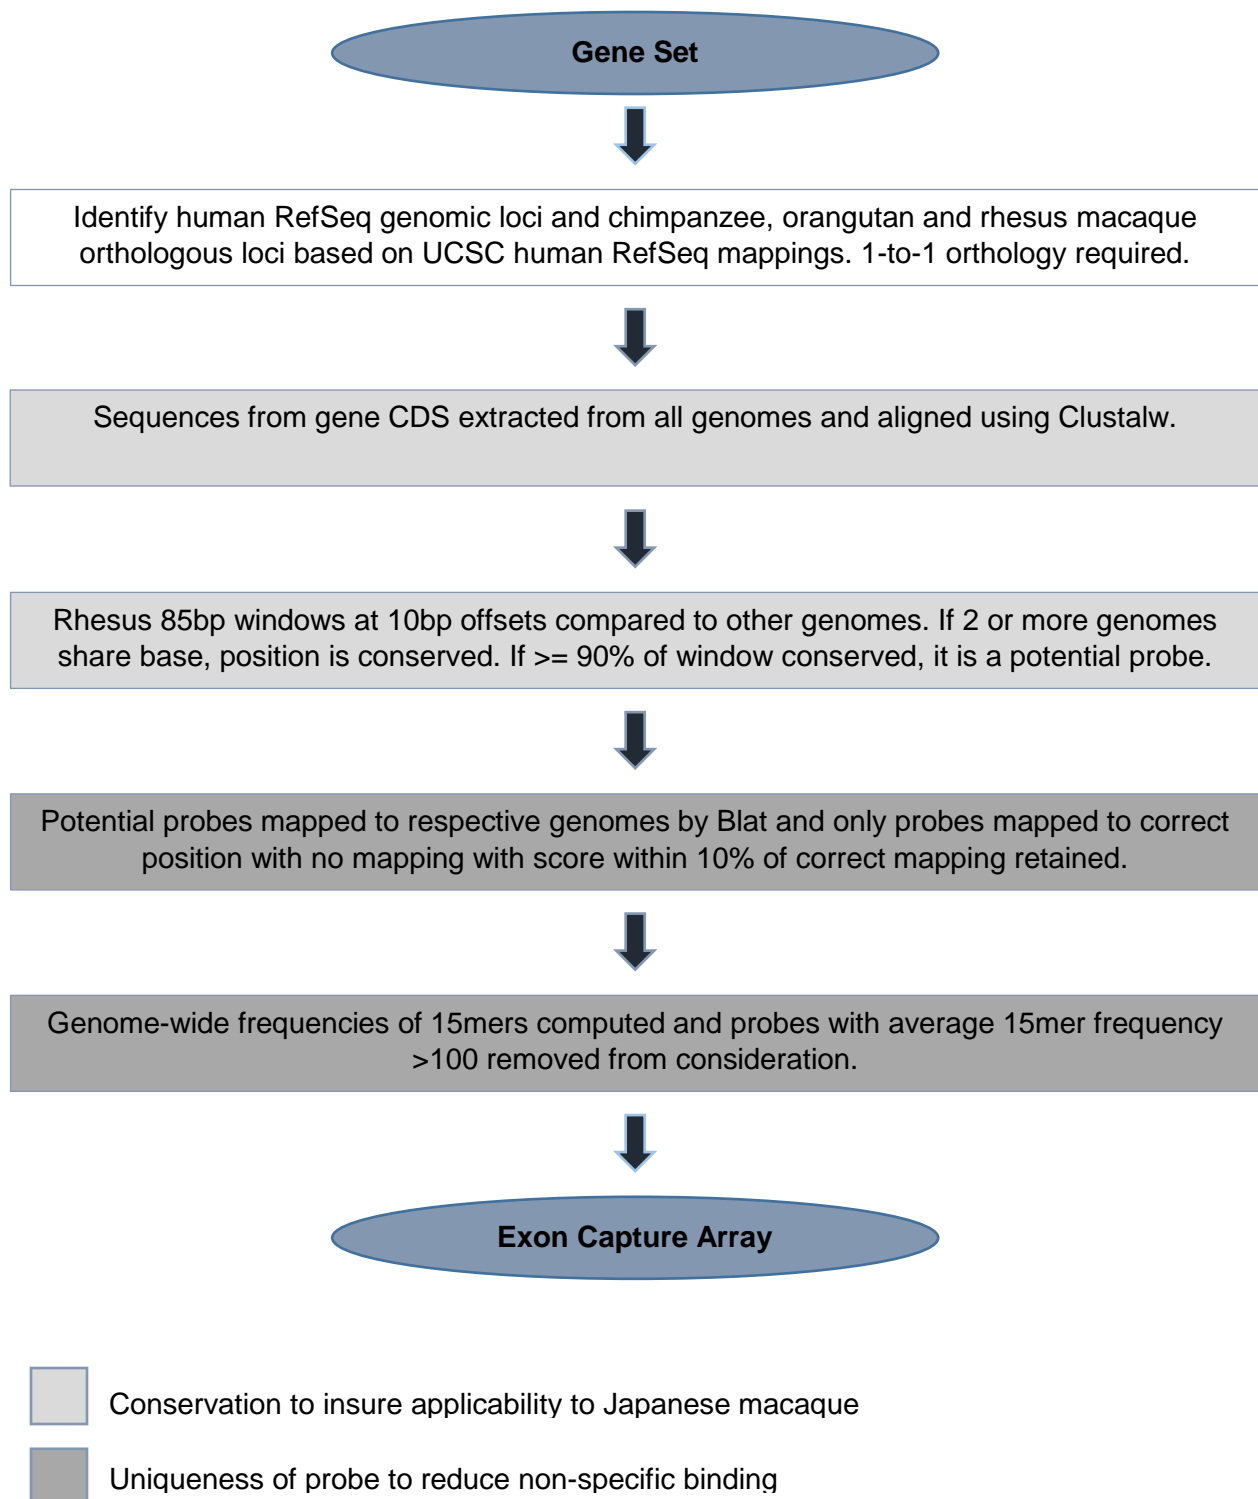

**Supplemental Figure 1.** Exon capture array design.

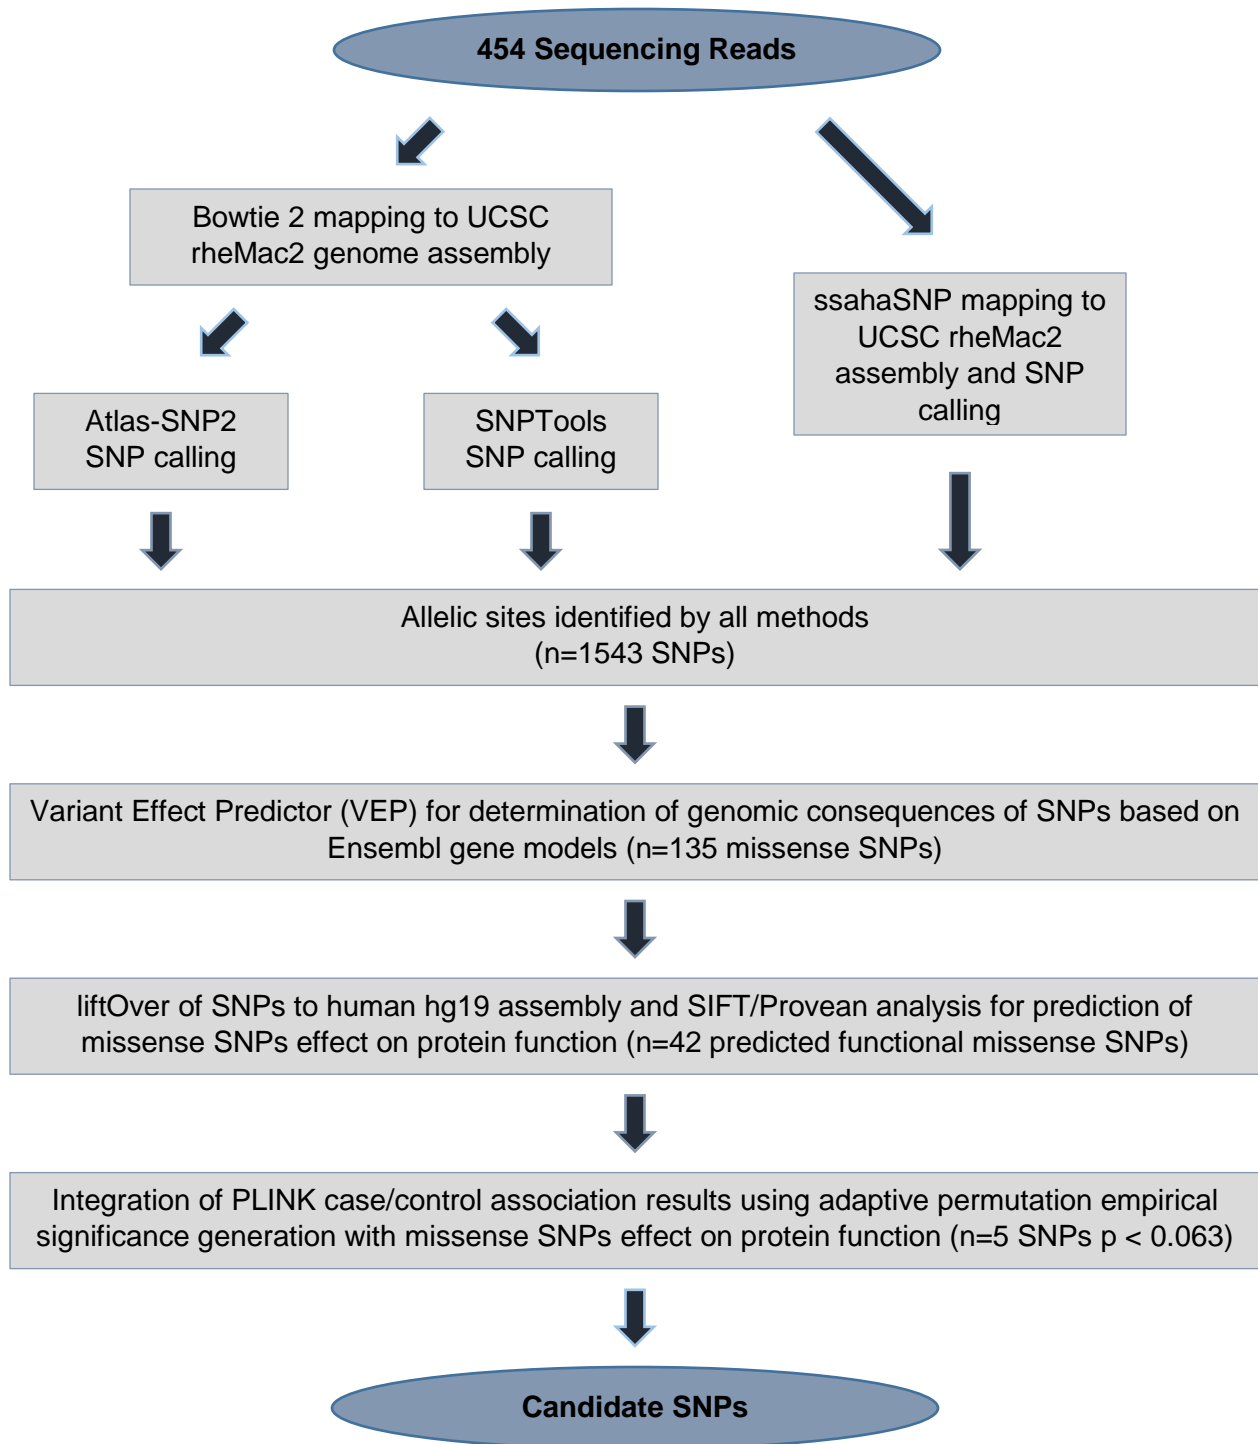

**Supplemental Figure 2.** SNP Calling

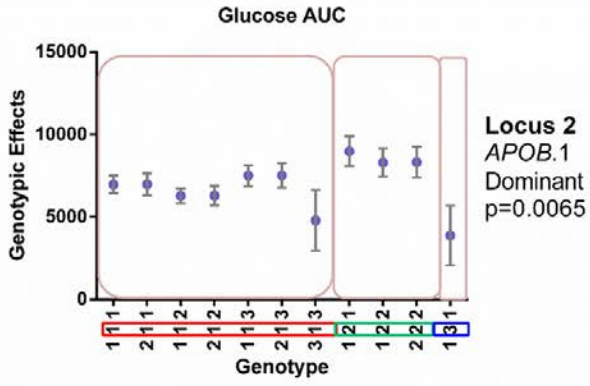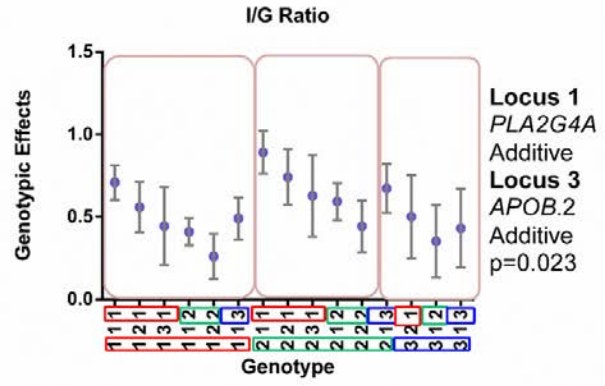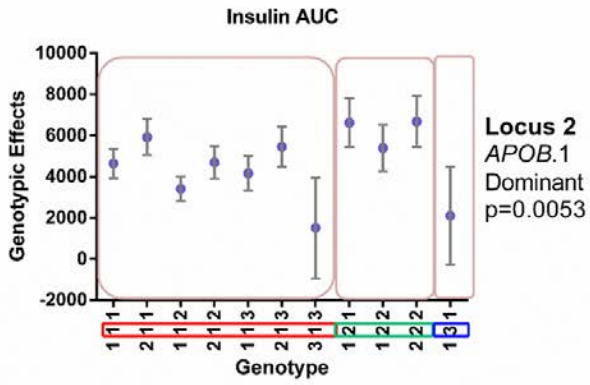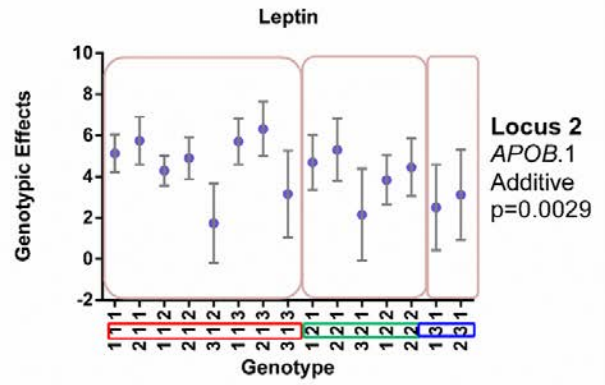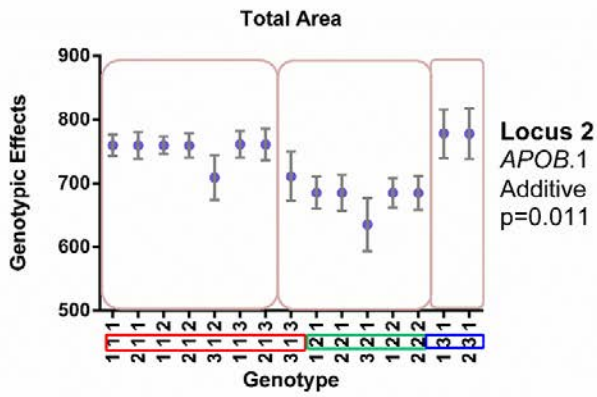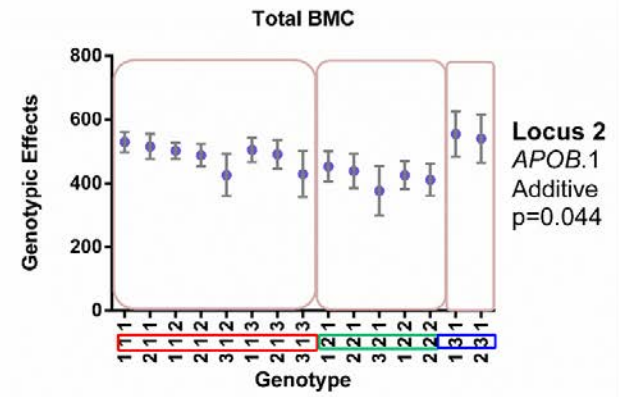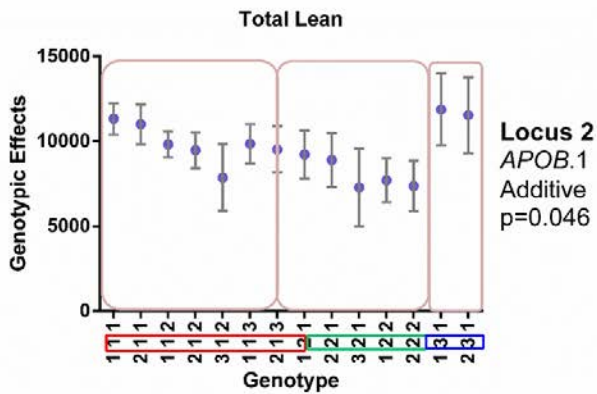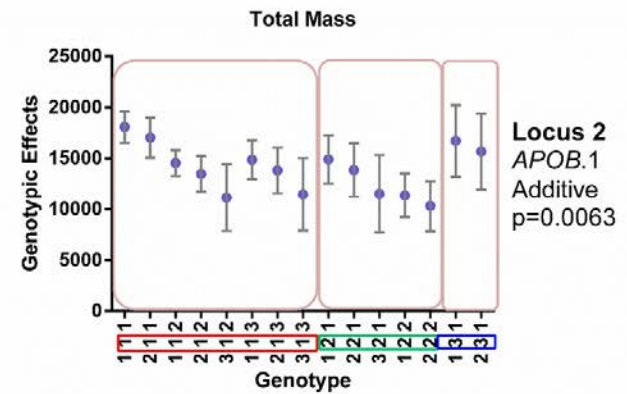

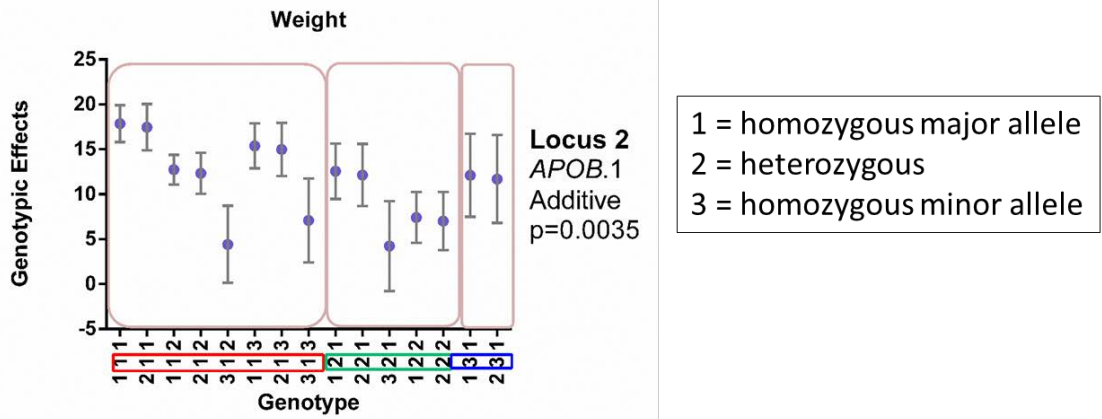

**Supplemental Figure 3.** Significant ( $p < 0.05$ ) genotype-phenotype NOIA three loci models based on genotypes for the extended panel of high fat diet exposed Japanese macaques. The Genotype axis shows the genotypes (1 = homozygous most frequent allele, 2 = heterozygous, 3 = homozygous least frequent allele) for each of the loci (ordered as *PLA2G4A*, *APOB.1*, *APOB.2*) and the Genotypic Effects axis shows the NOIA predicted effect of the genotype on a phenotype.
